# Supplementary material
Source: Springer Nature journal article supplement (https://www.springermedizin.de/resource/supplementary/12955_2012_1106_MOESM1_ESM.pdf/9559278)
Supplement: MOESM1 [file 9559278]

|                                              | Study Period |                                                                                    |                |                |                |                |                |                |                |       |
|----------------------------------------------|--------------|------------------------------------------------------------------------------------|----------------|----------------|----------------|----------------|----------------|----------------|----------------|-------|
|                                              | Enrollment*  | Week 1                                                                             | Week 2         | Week 3         | Week 4         | Week 5         | Week 6         | Week 7         | Week 8         | Final |
| Time point                                   | 0            | t <sub>1</sub>                                                                     | t <sub>2</sub> | t <sub>3</sub> | t <sub>4</sub> | t <sub>5</sub> | t <sub>6</sub> | t <sub>7</sub> | t <sub>8</sub> |       |
| Eligibility Screen                           |              |                                                                                    |                |                |                |                |                |                |                |       |
| Informed Consent                             | X            |                                                                                    |                |                |                |                |                |                |                |       |
| Height                                       | X            |                                                                                    |                |                |                |                |                |                |                |       |
| Weight                                       | X            |                                                                                    |                |                |                |                |                |                |                |       |
| Oxygen Saturation Level                      | X            |                                                                                    |                |                |                |                |                |                |                |       |
| Heart Rate                                   | X            |                                                                                    |                |                |                |                |                |                |                |       |
| Interventions                                |              |                                                                                    |                |                |                |                |                |                |                |       |
| Yoga Class                                   |              |  |                |                |                |                |                |                |                |       |
| Assessments                                  |              |                                                                                    |                |                |                |                |                |                |                |       |
| Baseline                                     |              |                                                                                    |                |                |                |                |                |                |                |       |
| Health History Questionnaire                 | X            |                                                                                    |                |                |                |                |                |                |                |       |
| ICAMP                                        | X            |                                                                                    |                |                |                |                |                |                |                |       |
| REALM-SF                                     | X            |                                                                                    |                |                |                |                |                |                |                |       |
| SAHLSA                                       | X            |                                                                                    |                |                |                |                |                |                |                |       |
| Baseline/Outcome                             |              |                                                                                    |                |                |                |                |                |                |                |       |
| RehabAssessment                              | X            |                                                                                    |                |                |                |                |                |                | X              |       |
| Health Promoting Lifestyle Profile (HPLP II) | X            |                                                                                    |                |                |                |                |                |                | X              |       |
| PROMIS-29                                    | X            |                                                                                    |                |                |                |                |                |                | X              |       |
| Self Efficacy Exercise Regularly             | X            |                                                                                    |                |                |                |                |                |                | X              |       |
| Self Rated Health                            | X            |                                                                                    |                |                |                |                |                |                | X              |       |
| Exit Interview                               |              |                                                                                    |                |                |                |                |                |                | X              |       |
| 3-month follow up                            |              |                                                                                    |                |                |                |                |                |                |                | X     |
| Other data variables                         |              |                                                                                    |                |                |                |                |                |                |                |       |
| Home Journals                                |              | X                                                                                  | X              | X              | X              | X              | X              | X              | X              |       |

\*No allocation because study uses a convenience sample instead of randomized sample.
